# Supplementary material for: Actin-Resistant DNase1L2 as a Potential Therapeutics for CF Lung Disease
Source: MDPI journal article supplement (doi:10.3390/biom11030410), 2021-03-10
Supplement: s1 [file s1]

Table S1. **Ensembl accession number, classification and name of DNase1L2 proteins included in the multiple alignment.**

| Organism               | Classification | Name <sup>a</sup> | Accession n°         |
|------------------------|----------------|-------------------|----------------------|
| <i>H. sapiens</i>      | Mammalia       | DNase1L2-L        | ENSP00000316938.5    |
| <i>H. sapiens</i>      | Mammalia       | DNase1L2-S        | ENSP00000371874.4    |
| <i>P. troglodytes</i>  | Mammalia       | DNase1L2-L        | ENSPTRP000000013061  |
| <i>G. gorilla</i>      | Mammalia       | DNase1L2-S        | ENSGGOP000000013907  |
| <i>M. mulatta</i>      | Mammalia       | DNase1L2-S        | ENSMMPUP000000053522 |
| <i>A. nancyanae</i>    | Mammalia       | DNase1L2-L        | ENSANAP000000013147  |
| <i>O. cuniculus</i>    | Mammalia       | DNase1L2-S        | ENSOCUP000000016098  |
| <i>T. truncatus</i>    | Mammalia       | DNase1L2-L        | ENSTTRP000000007777  |
| <i>B. taurus</i>       | Mammalia       | DNase1L2-S        | ENSBTAP000000013142  |
| <i>P. vampyrus</i>     | Mammalia       | DNase1L2-L        | ENSPVAP000000004824  |
| <i>E. telfairi</i>     | Mammalia       | DNase1L2-L        | ENSETEP000000007838  |
| <i>R. norvegicus</i>   | Mammalia       | DNase1L2-S        | ENSRNOP000000012203  |
| <i>M. musculus</i>     | Mammalia       | DNase1L2-S        | ENSMUSP000000085862  |
| <i>L. africana</i>     | Mammalia       | DNase1L2-S        | ENSLAFP000000027192  |
| <i>M. monoceros</i>    | Mammalia       | DNase1L2-S        | ENSMMPNP000015009148 |
| <i>M. domestica</i>    | Mammalia       | DNase1L2-S        | ENSMODP000000019845  |
| <i>G. gallus</i>       | Sauropsida     | DNase1L2-S        | ENSGALP000000064712  |
| <i>A. carolinensis</i> | Sauropsida     | DNase1L2-S        | ENSACAP000000000576  |
| <i>C. pictabellii</i>  | Sauropsida     | DNase1L2-S        | ENSCBPB000000015855  |
| <i>P. major</i>        | Sauropsida     | DNase1L2-S        | ENSPMJP000000013429  |

<sup>a</sup>Name in accordance with the presence (DNase1L2-L) or absence (DNase1L2-S) of the P-rich region (see Figure 1A)

Table S2. Viscosity measurements of CF artificial mucus after incubation with DNase1L2 or rhDNase in the presence or absence of actin (0.2 mg/ml).

|                   | Viscosity mPa·s (mean ± SD) |             |             |
|-------------------|-----------------------------|-------------|-------------|
|                   | 90 s                        | 300 s       | 600 s       |
| no enzyme         | 9783 ± 1656                 | 9667 ± 1457 | ND          |
| no enzyme + Actin | 8141 ± 689                  | 8171 ± 932  | ND          |
| DNase1L2          | 1847 ± 263                  | 603 ± 155   | 236 ± 40    |
| DNase1L2 + Actin  | 4649 ± 960                  | 2570 ± 865  | 1292 ± 446  |
| rhDNase           | 410 ± 58                    | 18 ± 16     | ND          |
| rhDNase + Actin   | 9330 ± 1537                 | 8469 ± 2068 | 6666 ± 2747 |
| rhDNase* + Actin  | 8606 ± 1377                 | 4925 ± 2663 | 1432 ± 1410 |

Enzyme concentration was: DNase1L2, 20 ng/μl - 5 U; rhDNase, 2 ng/μl - 5 U; rhDNase\*, 20 ng/μl - 50 U
